# Supplementary material for: Voltage controlled polarity switching of photoresponse in graphene oxide-based memristor
Source: Royal Society of Chemistry journal article supplement (doi:10.1039/d4tc02812k), 2024-01-01
Supplement: d4tc02812k1.pdf [file d4tc02812k1.pdf]

## Supplementary Information

### Voltage Controlled Polarity Switching of Photoresponse in Graphene oxide-based Memristor

Soma Saha<sup>a</sup>, Anindya Datta<sup>a,b</sup>, Tapanendu Kundu<sup>a,c,\*</sup>

<sup>a</sup>Centre for Research in Nanotechnology & Science (CRNTS), Indian Institute of Technology Bombay, Mumbai 400076, India.

<sup>b</sup>Department of Chemistry, Indian Institute of Technology Bombay, Mumbai 400076, India.

<sup>c</sup>Department of Physics, Indian Institute of Technology Bombay, Mumbai 400076, India

### Supplementary Results

| Active layer         | Electrodes (structure) | V <sub>Read</sub> (V) | V <sub>SET</sub> (V) | ON/OFF current ratio | Endurance cycles       | Retention time (s)      | Reference |
|----------------------|------------------------|-----------------------|----------------------|----------------------|------------------------|-------------------------|-----------|
| GO                   | Au/Au (planar)         | 0.7                   | -----                | ~21                  | 60                     | 10 <sup>4</sup>         | This work |
| GO                   | ITO/ITO (planar)       | -----                 | +2~-2                | ~3.5                 | 1000                   | -----                   | [38]      |
| GO                   | Al/Al (planar)         | -----                 | 0.7                  | ~10 <sup>3</sup>     | -----                  | -----                   | [39]      |
| PVA-GO               | Ag/Ag (vertical)       | -----                 | 0.42                 | ~7.20                | >2.5 × 10 <sup>3</sup> | >3.36 × 10 <sup>3</sup> | [24]      |
| GO                   | Cu/Pt (vertical)       | -0.1                  | 0.3~1                | ~20                  | 100                    | 10 <sup>4</sup>         | [10,22]   |
| GO                   | Ag/Pt (vertical)       | -----                 | 0.5~1                | ~50                  | 100                    | 10 <sup>5</sup>         | [10]      |
| GO                   | Au/Pt (vertical)       | -----                 | 0.6~0.8              | ~50                  | 100                    | 10 <sup>5</sup>         | [10]      |
| GO-cellulose         | Al/Al (vertical)       | -----                 | 7                    | ~10                  | -----                  | -----                   | [25]      |
| GO                   | Ag/ITO (vertical)      | 0.14                  | -----                | 5~10 <sup>4</sup>    | 2000                   | -----                   | [38]      |
| GO                   | Al/p-Ge (vertical)     | -1.7                  | -8.7                 | ~76                  | 100                    | 10 <sup>3</sup>         | [12]      |
| GO                   | Al/ p-Si (vertical)    | -1.2                  | -5.4~-5.5            | ~110                 | 100                    | 10 <sup>3</sup>         | [12]      |
| TiO <sub>2</sub> -GO | Ag/ITO (vertical)      | -----                 | -0.5                 | ~110                 | 100                    | 10 <sup>4</sup>         | [26]      |
| GO                   | Al/Al (vertical)       | -0.5                  | -2.5                 | ~10 <sup>3</sup>     | 100                    | 10 <sup>5</sup>         | [27]      |

Table S1: A summary of the reported Graphene oxide-based memristor, both in planar and vertical configurations.

Table S2: Summary of the observed negative photoresponse in Graphene oxide-based devices.

| Active layer                                                       | Negative Photoresponse at bias voltage (V) | References |
|--------------------------------------------------------------------|--------------------------------------------|------------|
| GO thin film                                                       | +3V to +4V                                 | This work  |
| GO thin film                                                       | +5V                                        | [35]       |
| GO/TiO <sub>2</sub> composites<br>(Wavelength ( $\lambda$ )>400nm) | 0V                                         | [54]       |
